# Supplementary material
Source: publisher figshare collection journal article supplement (https://tandf.figshare.com/articles/dataset/_/24159041)
Supplement: Supplementary file 1 [file 1]

**Supplementary materials to**

**Assessment of vaccinations and breakthrough infections after adjustment of the dynamic zero-COVID-19 strategy in China: An online survey**

**Shijie Qin1,2#, Yanhua Li2#, Likui Wang3,4, Xin Zhao2, Xiaopeng Ma1*, George F. Gao2,4***

1Institute of Pediatrics, Shenzhen Children's Hospital, Shenzhen, Guangdong Province 518026, China.

2CAS Key Laboratory of Pathogen Microbiology and Immunology, Institute of Microbiology, Chinese Academy of Sciences (CAS), Beijing, 100101, China.

3CAS Key Laboratory of Pathogenic Microbiology and Immunology, Institute of Microbiology, Center for Influenza Research and Early-warning (CASCIRE), CAS-TWAS Center of Excellence

for Emerging Infectious Diseases (CEEID), Chinese Academy of Sciences (CAS), Beijing, 100101, China.

4International Institute of Vaccine Research and Innovation, University of Chinese Academy of Sciences (UCAS), Beijing, 101408, China.

*Corresponding authors:

George F. Gao, DPhil (Oxon), Director and Professor.

CAS Key Laboratory of Pathogen Microbiology and Immunology, Institute of Microbiology, Chinese Academy of Sciences (CAS), Beijing, China.

Email: gaof@im.ac.cn

Tel.: 86-10-64807688

Fax: 86-10-64807882

Xiaopeng Ma, Director and Chief physician.

Institute of Pediatrics, Shenzhen Children's Hospital, Shenzhen, Guangdong Province 518026, China.

Email: maxiaopeng@126.com

#Contributed equally.

**Captions of supplementary figures S1-S6. Refer to the high-resolution figures submitted separately.**

**Figure S1. Baseline characteristics of questionnaire participants.**

A: diagram showing the proportion of SARS-CoV-2–positive participants. B: Diagram showing the sex ratio of the participants. C: Diagram showing the age distribution of the participants. D: Bar plot showing the proportion of vaccination doses among participants. E: Bar plot showing the smoking habit distribution among participants. F: Graph shows the drinking habit distribution among participants. G: Diagram showing the infection time periods of the participants.

**Figure S2. Complete forest plots showing the effects** **different vaccination statuses on different symptoms.**

Unvaccinated cases were used as controls. OR > 1 represents an increased risk of symptoms, OR < 1 represents a reduced risk of symptoms, which is a potential protective factor, and OR = 1 represents no association with symptoms.

**Figure S3. Complete forest plots showing the effects of** **different vaccination statuses on symptoms on symptoms at 1**–**2 months (A**–**B).**

Unvaccinated cases were used as controls. OR > 1 represents an increased risk of symptoms, OR < 1 represents a reduced risk of symptoms, which is a potential protective factor, and OR = 1 represents no association with symptoms.

**Figure S4. Complete forest plots showing the effects of different vaccination statuses on symptoms at 3 months.**

Unvaccinated cases were used as controls. OR > 1 represents an increased risk of symptoms, OR < 1 represents a reduced risk of symptoms, which is a potential protective factor, and OR = 1 represents no association with symptoms.

**Figure S5. Complete forest plot showing the effects of different vaccination timings on symptoms at 1**–**2 months (A**–**B).**

Unvaccinated cases were used as controls. OR > 1 represents an increased risk of symptoms, OR < 1 represents a reduced risk of symptoms, which is a potential protective factor, and OR = 1 represents no association with symptoms.

**Figure S6. Complete forest plot showing the effects of different vaccination timings on symptoms at 3 months.**

Unvaccinated cases were used as controls. OR > 1 represents an increased risk of symptoms, OR < 1 represents a reduced risk of symptoms, which is a potential protective factor, and OR = 1 represents no association with symptoms.

**Table S1. Questionnaire on SARS-CoV-2 infection among Chinese residents**

**Questions with * are requested, and those without * are optional.**

1. **Basic information**

**Where is your current permanent residence located? [single choice] ***

□a. East China (Provinces: Jiangsu, Zhejiang, Shandong, Anhui, Jiangxi, Fujian, Taiwan, Shanghai)

□b. South China (Provinces: Guangdong, Guangxi, Hainan, Hong Kong, Macau)

□c. Central China (Provinces: Hubei, Hunan, Henan)

□d. North China (Provinces: Shanxi, Hebei, Inner Mongolia, Beijing, Tianjin)

□e. Northeast China (Provinces: Jilin, Liaoning, Heilongjiang)

□f. Northwest China (Provinces: Xinjiang, Shaanxi, Gansu, Ningxia, Qinghai)

□g. Southwest China (Provinces: Sichuan, Xizang, Guizhou, Yunnan, Chongqing)

□h. Other countries (Countries and regions can be added) __________

**What is your sex? [single choice] ***

□a. Male

□b. Female

**How old are you? [single choice] ***

□a. Under 18 years old

□b. Ages 18 to 29

□c. Ages 30 to 39

□d. Ages 40 to 49

□e. Ages 50 to 59

□f. Ages 60 to 69

□g. Ages 70 to 80

□h. Over 80 years old

**What is your COVID vaccination status? [single choice]***

□ a. Vaccinated once

□ b. Vaccinated twice

□ c. Vaccinated three times

□ d. Vaccinated four times

□ e. Vaccinated five times

□ f. Not vaccinated

**What was the type of vaccine for the first dose you received? (Warm prompt: you can log in to the national government affairs service platform through Alipay/WeChat) [single choice]***

□ a. Inactivated vaccine

□ b. Adenovirus vectored vaccine

□ c. Recombinant protein vaccine

□ d. Not clear, don't remember

□ e. Other types of vaccines (can be noted)__________

**What was the type of vaccine for the second dose you received? (Warm prompt: you can log in to the national government affairs service platform through Alipay/WeChat) [single choice]***

□ a. Inactivated vaccine

□ b. Adenovirus vectored vaccine

□ c. Recombinant protein vaccine

□ d. Not clear, don't remember

□ e. Other types of vaccines (can be noted)__________

**What was the type of vaccine for the third dose you received? (Warm prompt: you can log in to the national government affairs service platform through Alipay/WeChat) [single choice]***

□ a. Inactivated vaccine

□ b. Adenovirus vectored vaccine

□ c. Recombinant protein vaccine

□ d. Not clear, don't remember

□ e. Other types of vaccines (can be noted)___________

**What was the type of vaccine for the fourth dose you received? (Warm prompt: you can log in to the national government affairs service platform through Alipay/WeChat) [single choice]***

□ a. Inactivated vaccine

□ b. Adenovirus vectored vaccine

□ c. Recombinant protein vaccine

□ d. Not clear, don't remember

□ e. Other types of vaccines (can be noted)___________

**What was the type of vaccine for the fifth dose you received? (Warm prompt: you can log in to the national government affairs service platform through Alipay/WeChat) [single choice]***

□ a. Inactivated vaccine

□ b. Adenovirus vectored vaccine

□ c. Recombinant protein vaccine

□ d. Not clear, don't remember

□ e. Other types of vaccines (can be noted)___________

**How long has it been since your last vaccination? [single choice]***

□ a.Within 3 months

□ b.3-6 months

□ c.7-12 months

□ d. Over 12 months

**2、 Personal health and infection status**

**Did you test (nucleic acid and/or antigen) positive for SARS-CoV-2? [single choice]***

□ a. Negative

□ b. Positive (Including already positive or currently positive)

□ c. Not tested, with symptoms speculated to be positive

□ d. Not clear

**When did you probably discover that you were positive? [single choice]***

□ a. After October 2022

□ b. January 2022 to September 2022

□ c. Before 2022

**Did you have the following symptoms during infection? [Multiple choice]***

□ a. High fever (highest temperature above 39.1 degrees Celsius)

□ b. Fever (between 37.4 and 39 degrees Celsius)

□ c. Fatigue

□ d. Headache/dizziness

□ e. Full body soreness

□ f. Fear of cold/shivering

□ g. Pharyngeal pain

□ h. Nasal congestion

□ i. Runny nose

□ j. Cough

□ k. Expectoration

□ l. Decrease in taste and smell

□ m. Diarrhea

□ n. Nausea

□ o. Vomiting

□ p. Abdominal pain

□ q. Difficulty breathing/shortness of breath

□ r. Conjunctivitis

□ s. Sore eyes and prone to fatigue

□ t. Palpitations

□ u. Tinnitus/Earache

□ v. Other symptoms (can be filled in)______________

□ w. No above or any other symptoms (Asymptomatic infection)

**How many days after infection your symptoms have significantly improved? [single choice]***

□ a. Within 3 days

□ b. Day 3-5

□ c. Day 6-7

□ d. Week 2 (8-14 days)

□ e. Over 2 weeks

□ f. Not yet improved

**How did you seek medical attention after infection and how severe was of your condition? [single choice]***

□ a. No need to go to the hospital

□ b. Went to the hospital without hospitalization

□ c. Hospitalization required, waiting for bed availability

□ d. In hospital treatment

□ e. Emergency or ICU rescue

□ f. Other (can be noted)________

**How many people in your family have vaccination and infection symptoms similar to yours? [single choice]**

□ a.1 family member

□ b. 2 family members

□ c. 3 family members

□ d. 4 family members

□ e. 5 family members

□ f. Above 5 family members

□ g. Other (unclear)

**Do you have the following medical conditions? [Multiple choice question]***

□ a. Chronic obstructive pulmonary disease

□ b. Emphysema

□ c. Other respiratory disease (such as asthma, chronic bronchitis)

□ d. Diabetes

□ e. Hypertension

□ f. Cardio cerebrovascular disease

□ g. Chronic kidney disease

□ h. Chronic liver disease

□ i. Pregnant or parturient women

□ j. Malignant tumor under treatment

□ k. Malignant tumor but treatment have ended (radiotherapy and chemotherapy have ended)

□ l. Benign tumor

□ m. Autoimmune disease (such as Rheumatoid arthritis, SLE or immunodeficiency disease)

□ n. None of the above situations

**Do you smoke? [single choice]***

□ a. No

□ b. 1-5 cigarettes per month

□ c. 1-5 cigarettes per day

□ d. 6-10 cigarettes per day

□ e. 11-20 cigarettes per day

□ f. More than 20 cigarettes per day

**Do you drink alcohol? [single choice]***

□ a. Never drink alcohol

□ b. 1-3 times per year on average

□ c. 1-3 times per month on average

□ d. 1-3 times per week on average

□ e. once or more times per day on average

**Did you still have the following symptoms one month after infection? (If the infection has been over a month, please fill in) [Multiple choice]**

□ a. Fatigue

□ b. Drowsiness

□ c. Headache/dizziness/migraine

□ c. Cough

□ e. Pharyngeal discomfort

□ f. Change or decrease in taste perception

□ g. Changes or decreases in olfactory perception

□ h. Gastrointestinal discomfort

□ i. Eye soreness and eye fatigue

□ j. Decreased vision

□ k. Difficulty breathing/shortness of breath

□ l. Decreased athletic ability

□ m. Arrhythmias/palpitations

□ n. Chest pain

□ o. Abnormal blood sugar

□ p. Anemia

□ q. Anxiety

□ r. Depression

□ s. Sleep disorder

□ t. Hair loss

□ u. Tinnitus/Earache

□ v. Other symptoms (can be noted)______________

□ w. No symptoms above (completely recovered)

**Did you still have the following symptoms two months after infection? (If the infection has been two months, please fill in) [Multiple choice]**

□ a. Fatigue

□ b. Drowsiness

□ c. Headache/dizziness/migraine

□ c. Cough

□ e. Pharyngeal discomfort

□ f. Change or decrease in taste perception

□ g. Changes or decreases in olfactory perception

□ h. Gastrointestinal discomfort

□ i. Eye soreness and eye fatigue

□ j. Decreased vision

□ k. Difficulty breathing/shortness of breath

□ l. Decreased athletic ability

□ m. Arrhythmias/palpitations

□ n. Chest pain

□ o. Abnormal blood sugar

□ p. Anemia

□ q. Anxiety

□ r. Depression

□ s. Sleep disorder

□ t. Hair loss

□ u. Tinnitus/Earache

□ v. Other symptoms (can be noted)_________________

□ w. No symptoms above (completely recovered)

**Did you still have the following symptoms three months after infection? (If the infection has been three months, please fill in) [Multiple choice]**

□ a. Fatigue

□ b. Drowsiness

□ c. Headache/dizziness/migraine

□ c. Cough

□ e. Pharyngeal discomfort

□ f. Change or decrease in taste perception

□ g. Changes or decreases in olfactory perception

□ h. Gastrointestinal discomfort

□ i. Eye soreness and eye fatigue

□ j. Decreased vision

□ k. Difficulty breathing/shortness of breath

□ l. Decreased athletic ability

□ m. Arrhythmias/palpitations

□ n. Chest pain

□ o. Abnormal blood sugar

□ p. Anemia

□ q. Anxiety

□ r. Depression

□ s. Sleep disorder

□ t. Hair loss

□ u. Tinnitus/Earache

□ v. Other symptoms (can be noted)_________________

□ w. No symptoms above (completely recovered)

**Did you still have the following symptoms four months after infection? (If the infection has been four months, please fill in) [Multiple choice]**

□ a. Fatigue

□ b. Drowsiness

□ c. Headache/dizziness/migraine

□ c. Cough

□ e. Pharyngeal discomfort

□ f. Change or decrease in taste perception

□ g. Changes or decreases in olfactory perception

□ h. Gastrointestinal discomfort

□ i. Eye soreness and eye fatigue

□ j. Decreased vision

□ k. Difficulty breathing/shortness of breath

□ l. Decreased athletic ability

□ m. Arrhythmias/palpitations

□ n. Chest pain

□ o. Abnormal blood sugar

□ p. Anemia

□ q. Anxiety

□ r. Depression

□ s. Sleep disorder

□ t. Hair loss

□ u. Tinnitus/Earache

□ v. Other symptoms (can be noted)_________________

□ w. No symptoms above (completely recovered)

**Revised Table S2. Comparison of disease severity between comorbidity group and non- comorbidity COIVD-19 participants.**

| **Comparison of disease severity between comorbidity group and non- comorbidity COIVD-19 participants** | | | |
| --- | --- | --- | --- |
| **Comorbidities** | **Mild illness** | **Hospitalization required** | **p-value** |
| Chronic obstructive pulmonary disease (No) | 6493 (98.95%) | 69 (1.05%) | p < 0.001 |
| Chronic obstructive pulmonary disease (Yes) | 42 (91.3%) | 4 (8.7%) |
| Emphysema (No) | 6502 (98.89%) | 73 (1.11%) | 1 |
| Emphysema (Yes) | 33 (100%) | 0 (0%) |
| Respiratory diseases (asthma, chronic bronchitis, etc.) (No) | 6254 (99%) | 63 (1%) | p < 0.001 |
| Respiratory diseases (asthma, chronic bronchitis, etc.) (Yes) | 281 (96.56%) | 10 (3.44%) |
| Diabetes (No) | 6342 (99%) | 64 (1%) | p < 0.001 |
| Diabetes (Yes) | 193 (95.54%) | 9 (4.46%) |
| Hypertension (No) | 6000 (99.21%) | 48 (0.79%) | p < 0.001 |
| Hypertension (Yes) | 535 (95.54%) | 25 (4.46%) |
| Cardio-cerebrovascular disease (No) | 6397 (99.21%) | 51 (0.79%) | p < 0.001 |
| Cardio-cerebrovascular disease (Yes) | 138 (86.25%) | 22 (13.75%) |
| Chronic nephrosis (No) | 6506 (99%) | 66 (1%) | p < 0.001 |
| Chronic nephrosis (Yes) | 29 (80.56%) | 7 (19.44%) |
| Chronic liver disease (No) | 6492 (98.92%) | 71 (1.08%) | 0.15 |
| Chronic liver disease (Yes) | 43 (95.56%) | 2 (4.44%) |
| Pregnancy (No) | 6468 (98.91%) | 71 (1.09%) | 0.39 |
| Pregnancy (Yes) | 67 (97.1%) | 2 (2.9%) |
| Malignant tumor in treatment (No) | 6518 (98.89%) | 73 (1.11%) | 1 |
| Malignant tumor in treatment (Yes) | 17 (100%) | 0 (0%) |
| Malignant tumor after treatment (No) | 6474 (98.96%) | 68 (1.04%) | p < 0.001 |
| Malignant tumor after treatment (Yes) | 61 (92.42%) | 5 (7.58%) |
| Benign tumor (No) | 6481 (98.89%) | 73 (1.11%) | 0.90 |
| Benign tumor (Yes) | 54 (100%) | 0 (0%) |
| Autoimmune disease (No) | 6429 (98.92%) | 70 (1.08%) | 0.23 |
| Autoimmune disease (Yes) | 106 (97.25%) | 3 (2.75%) |

**Revised Table S3. Comparison of time for significant improvement in symptoms between comorbidity group and non- comorbidity COIVD-19 participants.**

| **Comparison of time for significant improvement in symptoms between comorbidity group and non- comorbidity COIVD-19 participants** | | | | | | | |
| --- | --- | --- | --- | --- | --- | --- | --- |
| **Comorbidities** | **Within 3 days** | **Day 3-5** | **Day 6-7** | **8-14 days** | **More than 2 weeks** | **Not yet improved** | **p-value** |
| Chronic obstructive pulmonary disease (No) | 1549 (23.18%) | 2562 (38.34%) | 1438 (21.52%) | 674 (10.09%) | 404  (6.05%) | 55  (0.82%) | p < 0.001 |
| Chronic obstructive pulmonary disease (Yes) | 6  (13.04%) | 14 (30.43%) | 9  (19.57%) | 6 (13.04%) | 6  (13.04%) | 5  (10.87%) |
| Emphysema (No) | 1549 (23.14%) | 2562 (38.27%) | 1442 (21.54%) | 678 (10.13%) | 404  (6.03%) | 60  (0.9%) | 0.08 |
| Emphysema (Yes) | 6  (18.18%) | 14 (42.42%) | 5  (15.15%) | 2  (6.06%) | 6  (18.18%) | 0  (0%) |
| Respiratory diseases (asthma, chronic bronchitis, etc.) (No) | 1501 (23.37%) | 2485 (38.68%) | 1374 (21.39%) | 647 (10.07%) | 370  (5.76%) | 47  (0.73%) | p < 0.001 |
| Respiratory diseases (asthma, chronic bronchitis, etc.) (Yes) | 54  (17.76%) | 91 (29.93%) | 73 (24.01%) | 33 (10.86%) | 40  (13.16%) | 13  (4.28%) |
| Diabetes (No) | 1505 (23.08%) | 2514 (38.55%) | 1400 (21.47%) | 654 (10.03%) | 390  (5.98%) | 58  (0.89%) | 0.08 |
| Diabetes (Yes) | 50 (24.15%) | 62 (29.95%) | 47 (22.71%) | 26 (12.56%) | 20  (9.66%) | 2  (0.97%) |
| Hypertension (No) | 1445 (23.49%) | 2398 (38.98%) | 1321 (21.47%) | 596 (9.69%) | 343  (5.58%) | 49  (0.8%) | p < 0.001 |
| Hypertension (Yes) | 110  (19.1%) | 178 (30.9%) | 126 (21.88%) | 84 (14.58%) | 67  (11.63%) | 11  (1.91%) |
| Cardio-cerebrovascular disease (No) | 1537 (23.42%) | 2530 (38.54%) | 1411 (21.5%) | 655 (9.98%) | 378  (5.76%) | 53  (0.81%) | p < 0.001 |
| Cardio-cerebrovascular disease (Yes) | 18 (10.98%) | 46 (28.05%) | 36 (21.95%) | 25 (15.24%) | 32  (19.51%) | 7  (4.27%) |
| Chronic nephrosis (No) | 1550 (23.17%) | 2565 (38.34%) | 1441 (21.54%) | 672 (10.04%) | 407 (6.08%) | 56 (0.84%) | p < 0.001 |
| Chronic nephrosis (Yes) | 5  (13.51%) | 11 (29.73%) | 6 (16.22%) | 8 (21.62%) | 3  (8.11%) | 4  (10.81%) |
| Chronic liver disease (No) | 1545 (23.13%) | 2561 (38.33%) | 1438 (21.52%) | 672 (10.06%) | 406  (6.08%) | 59  (0.88%) | 0.52 |
| Chronic liver disease (Yes) | 10 (21.28%) | 15 (31.91%) | 9  (19.15%) | 8 (17.02%) | 4  (8.51%) | 1  (2.13%) |
| Pregnancy (No) | 1547 (23.24%) | 2548 (38.27%) | 1428 (21.45%) | 670 (10.06%) | 405  (6.08%) | 60  (0.9%) | 0.20 |
| Pregnancy (Yes) | 8  (11.43%) | 28  (40%) | 19 (27.14%) | 10 (14.29%) | 5  (7.14%) | 0  (0%) |
| Malignant tumor in treatment (No) | 1550 (23.1%) | 2569 (38.29%) | 1444 (21.52%) | 679 (10.12%) | 409  (6.1%) | 59  (0.88%) | 0.40 |
| Malignant tumor in treatment (Yes) | 5  (27.78%) | 7  (38.89%) | 3  (16.67%) | 1  (5.56%) | 1  (5.56%) | 1  (5.56%) |
| Malignant tumor after treatment (No) | 1548 (23.25%) | 2555 (38.37%) | 1432 (21.5%) | 671 (10.08%) | 399  (5.99%) | 54  (0.81%) | p < 0.001 |
| Malignant tumor after treatment (Yes) | 7  (10.14%) | 21 (30.43%) | 15 (21.74%) | 9 (13.04%) | 11  (15.94%) | 6  (8.7%) |
| Benign tumor (No) | 1540 (23.08%) | 2557 (38.33%) | 1435 (21.51%) | 677 (10.15%) | 405  (6.07%) | 57  (0.85%) | 0.01 |
| Benign tumor (Yes) | 15  (26.32%) | 19 (33.33%) | 12 (21.05%) | 3  (5.26%) | 5  (8.77%) | 3  (5.26%) |
| Autoimmune disease (No) | 1527 (23.08%) | 2543 (38.44%) | 1431 (21.63%) | 667 (10.08%) | 392  (5.93%) | 55  (0.83%) | p < 0.001 |
| Autoimmune disease (Yes) | 28  (24.78%) | 33  (29.2%) | 16 (14.16%) | 13 (11.5%) | 18  (15.93%) | 5  (4.42%) |
